# Supplementary material
Source: publisher figshare collection journal article supplement (https://acs.figshare.com/ndownloader/files/11438057)
Supplement: Supplementary file 1 [file 11438057]

## Supporting Information

### **In situ preparation of stabilized iron sulfide nanoparticles-impregnated alginate composite for selenite remediation**

Jun Wu<sup>1,2</sup>, Raymond Jianxiong Zeng<sup>1,2,\*</sup>

<sup>1</sup>Fujian Provincial Key Laboratory of Soil Environmental Health and Regulation,  
College of Resources and Environment, Fujian Agriculture and Forestry University,  
Fuzhou 350002, China

<sup>2</sup>CAS Key Laboratory for Urban Pollutant Conversion, Department of Chemistry,  
University of Science & Technology of China, Hefei 230026, PR China

\* Correspondence concerning this article should be addressed to:

Raymond J. Zeng at [rzeng@ustc.edu.cn](mailto:rzeng@ustc.edu.cn). Tel/Fax: +86 591 83303682

This SI contains 24-page document, including 7-page descriptions about chemicals, microorganisms and cultivation, characterization, determination of FeS amount in SA beads, kinetic experiments and isotherm models, effects of pH and anions on the removal efficiency, and column experiment, 5 tables and 11 figures

19    **Chemicals**

20           High-molecular-weight SA (M.W.=200000-270000),  $\text{FeSO}_4 \cdot 7\text{H}_2\text{O}$ ,  $\text{Na}_2\text{SeO}_3$ ,  
21   ascorbic acid, *o*-phenanthroline,  $\text{NaCl}$ ,  $\text{Na}_2\text{CO}_3$ ,  $\text{Na}_3\text{PO}_4$ ,  $\text{Fe}(\text{OH})_3$ ,  $\text{CaCl}_2$ ,  $\text{HCl}$ , and  
22    $\text{NaOH}$  were purchased from Sinopharm Chemical Reagent Co., Ltd. (Shanghai,  
23   China).  $\text{Na}_2\text{S} \cdot 9\text{H}_2\text{O}$  was obtained from Aladdin Chemistry Co. Ltd. (Shanghai, China).  
24   Iron selenide ( $\text{FeSe}$ ) was purchased from Alfa Aesar (China) Chemical Co., LTD  
25   (Shanghai, China). Metal selenium ( $\text{Se}$  (0)) was purchased from Macklin Biochemical  
26   Technology Co., Ltd. (Shanghai, China).  
27   4-(2-hydroxyethyl)-1-Piperazineethanesulfonic acid (HEPES) was from Biosharp Co.,  
28   Ltd. All solutions were prepared with deionized (DI) water.

29    **Microorganisms and cultivation**

30            SRB, *Desulfovibrio vulgaris* (NBRC 104121), was purchased from National  
31    Institute of Technology and Evaluation of Japan. It was first anaerobic cultivated in  
32    serum bottle to the stationary phase at 37 °C with NBRC medium 1021, which  
33    consists of 0.5 g/L K<sub>2</sub>HPO<sub>4</sub>, 1 g/L NH<sub>4</sub>Cl, 1 g/L Na<sub>2</sub>SO<sub>4</sub>, 0.1 g/L CaCl<sub>2</sub>·2H<sub>2</sub>O, 2 g/L  
34    MgSO<sub>4</sub>·7H<sub>2</sub>O, 2 g/L sodium lactate, 1 g/L yeast extract, 0.5 g/L FeSO<sub>4</sub>·7H<sub>2</sub>O, 1 mg/L  
35    resazurin, and 10 thioglycolate solution (0.1 g sodium thioglycolate and 0.1 g ascorbic  
36    acid were dissolved to 10 mL distilled water, sterilize by filtration). All the chemicals  
37    were purchased from Sinopharm Chemical Reagent Co., Ltd. (Shanghai, China).

## 38    **Characterization**

39        Images obtained by field emission scanning electron microscopy (FE-SEM) were  
40    captured on a JEOL JSM-6700F microscope (JEOL, Japan). A thin film of gold was  
41    used to increase the conductivity of the samples for SEM. Next, a FeS-SA bead was  
42    cut into slices with a microtome Leica CM1950 (Leica, Germany), and the slice was  
43    transferred onto the well of a microscope slide before observation. A phase-contrast  
44    microscope, Olympus IX81 (Olympus, Japan), was used to observe the gel structure  
45    of the slices. Transmission electron microscopy (TEM) was conducted using a  
46    JEOL-2010 JSM microscope (JEOL, Japan) at an acceleration voltage of 200 kV.  
47    Powder X-ray diffraction (XRD) patterns were recorded at a scanning rate of 0.02°/s  
48    in the 2 $\theta$  range of 10°–60° on a Philips X'Pert ProSuper X-ray diffractometer (Philips,  
49    Netherlands) using graphite-monochromatized Cu K $\alpha$  radiation ( $\lambda$  = 1.54178 Å).  
50    Thermogravimetric (TG) analysis was performed with SDT Q600 (TA Instruments,  
51    USA) under a stream of air at a heating rate of 10 °C/min. X-ray photoelectron  
52    spectroscopy (XPS) was conducted with Thermo Escalab 250 (Thermo VG Scientific,  
53    UK) using a monochromatic Al K $\alpha$  source (1,486.6 eV). The intensity of each XPS  
54    peak was recorded in counts per second. A Casa XPS software based on Monte-Carlo  
55    method was used to estimate the standard deviation of the component peak areas used  
56    in the fitting procedure.

57     **Determination of FeS amount in SA beads**

58           To conduct comparative analysis between FeS-SA beads and pure FeS  
59   suspension, the amount of FeS immobilized in alginate beads was measured.  
60   Concentrated HCl was diluted with purged DI water to reach 2 M, and then 50 mL of  
61   diluted HCl was added to the FeS-SA beads. The solution was taken out to determine  
62   the concentration of Fe(II) after 12 h of immersion. The amount of FeS was calculated  
63   based on the concentration of Fe(II). Furthermore, due to the stability of FeS-SA after  
64   heating at 700 °C,<sup>33</sup> the difference in the weight loss between FeS-SA beads and SA  
65   beads was determined by TG analysis, and the amount of FeS was calculated based on  
66   the initial weight of FeS-SA. An equal concentration of pure FeS suspension was  
67   prepared for a comparison with FeS-SA.

68

## 69 Experiments and isotherm models

70 Concentrations of 0, 2, 6, 8, 10, 12, 16, and 20 mg/L Se(IV) were set to  
71 determine the adsorption isotherm, and the Se(IV) concentration and final pH were  
72 measured after equilibrium. Freundlich and Langmuir models adsorption isotherms  
73 were utilized to describe the adsorption equilibrium.

74 Langmuir isotherm model is represented mathematically as bellows:

$$q_e = \frac{q_m K_L C_e}{1 + K_L C_e}$$

75 In this equation  $q_e$  is the equilibrium adsorption quantity (mg/g),  $C_e$  is the equilibrium  
76 liquid phase concentration (mg/L),  $q_m$  is the maximum adsorption capacity (mg/g).

77 The Freundlich model can be represented as bellows:

$$q_e = K_F C_e^{1/n}$$

78  $q_e$  is the equilibrium adsorption quantity (mg/g),  $C_e$  is the equilibrium liquid phase  
79 concentration (mg/L),  $K_F$  and  $n$  denoting a distribution coefficient ((mg/g)/(mg/L)<sup>n</sup>)  
80 and intensity of adsorption, respectively.

## 81    **Effects of pH and anions on the removal efficiency**

82        Batch equilibrium tests were conducted in 50-mL glass vials to investigate the  
83    effects of pH and anions (e.g., NaCl, Na<sub>2</sub>CO<sub>3</sub>, and Na<sub>3</sub>PO<sub>4</sub>) on Se(IV) removal  
84    efficiency using FeS-SA beads. Each vial was loaded with Se(IV) at a concentration  
85    of 10 mg/L. The initial pH of the mixture was adjusted within the range from 4 to 10.  
86    The concentrations of anions were set between 0 and 120 mg/L. The solutions were  
87    placed in a shaker (at 170 rpm) at room temperature (25 °C) to reach equilibrium and  
88    were then sampled to measure the concentration of Se(IV).

## 89    **Column experiment**

90        Dynamic flow adsorption experiments were performed in a glass column with an  
91    internal diameter of 1.2 cm and a length of 30 cm to evaluate the breakthrough  
92    behavior and the applicability of FeS-SA for the removal of Se(IV) under dynamic  
93    conditions. The column was packed with FeS-SA beads and shaken so that higher  
94    amounts of FeS-SA beads were packed in the column without gaps. The influent  
95    solution was pumped into the column by a Longer Pump (BT100-1L) at a flow rate of  
96    10 mL/h in an up-flow mode, ensuring that more contact time was obtained and any  
97    channeling of the influent solution reduced. The influent concentration was  
98    maintained at 10 mg/L. The effluent solution was collected at different time intervals,  
99    and the concentration of Se(IV) was monitored. The adsorption bed was considered to  
100    be exhausted when the effluent concentration reached 10 mg/L.



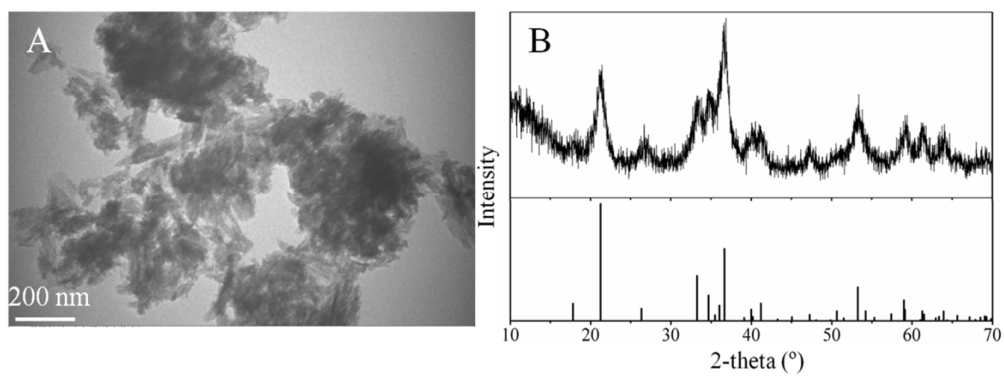

101

102 **Figure S1.** (A) TEM and (B) XRD patterns of the  $\alpha$ -FeOOH; (Goethite, JCPDS:

103 81-0464).

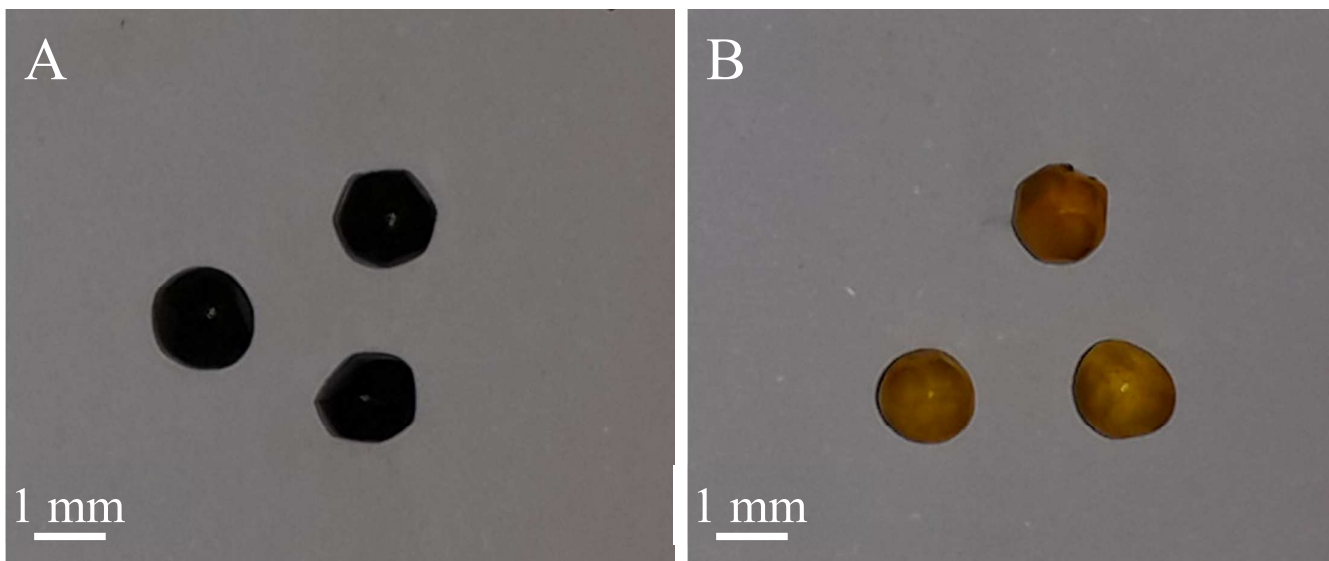

104

105

**Figure S2.** Photograph of FeS-SA (A) before and (B) after reacting with Se(IV).

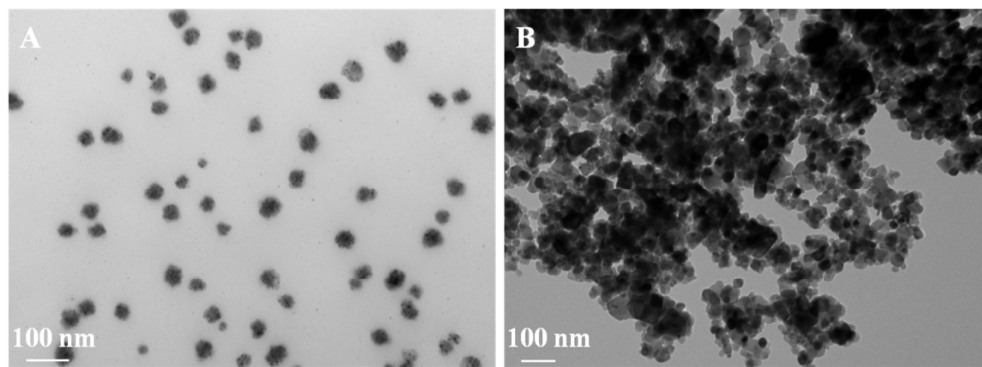

106

107

**Figure S3.** TEM of (A) FeS nanoparticles stabilized by SA (B) non-stabilized FeS.

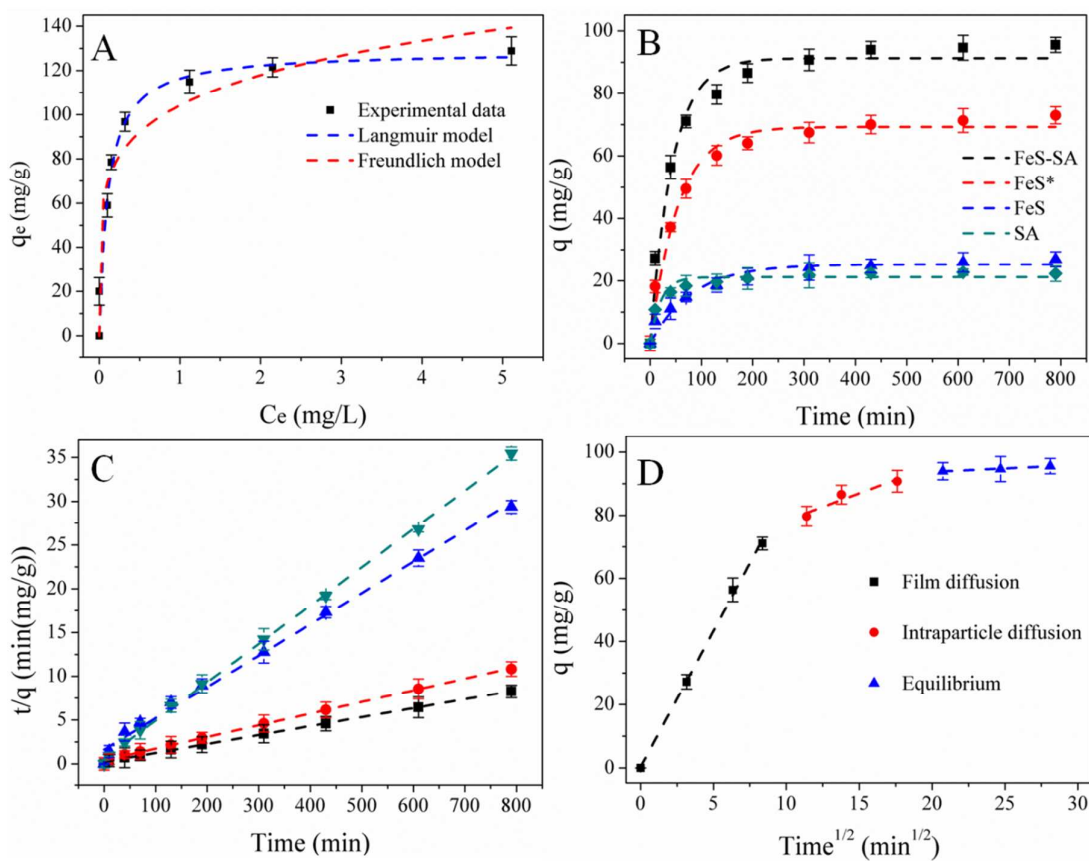

108 **Figure S4.** (A) Se(IV) removal isotherm of FeS-SA beads. Initial Se = 2–20 mg/L,  
 109 initial pH =  $6.0 \pm 0.1$ . Se(IV) removal kinetics of (B) pseudo-first-order, (C)  
 110 pseudo-second-order, and (D) Weber-Morris fittings by FeS-SA. Initial Se = 10 mg/L,  
 111 initial pH =  $6.0 \pm 0.1$ . Symbols: experimental data; lines: model fittings.

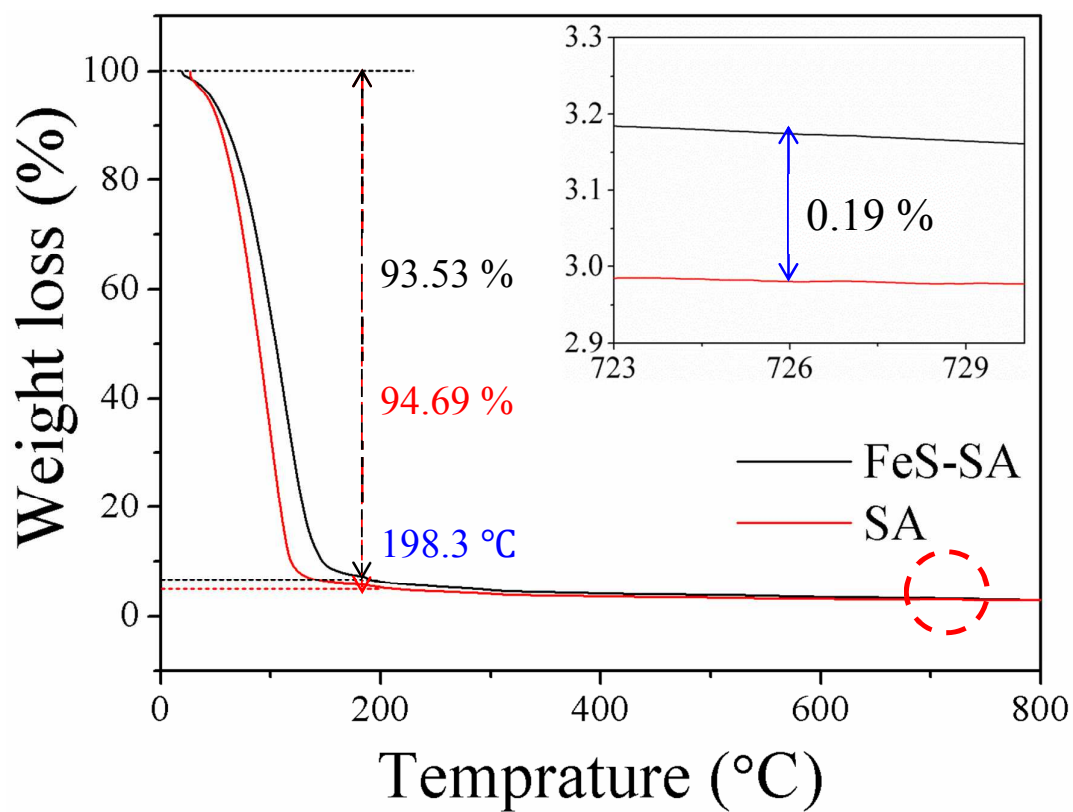

**Figure S5.** TG curve of FeS-SA and SA.

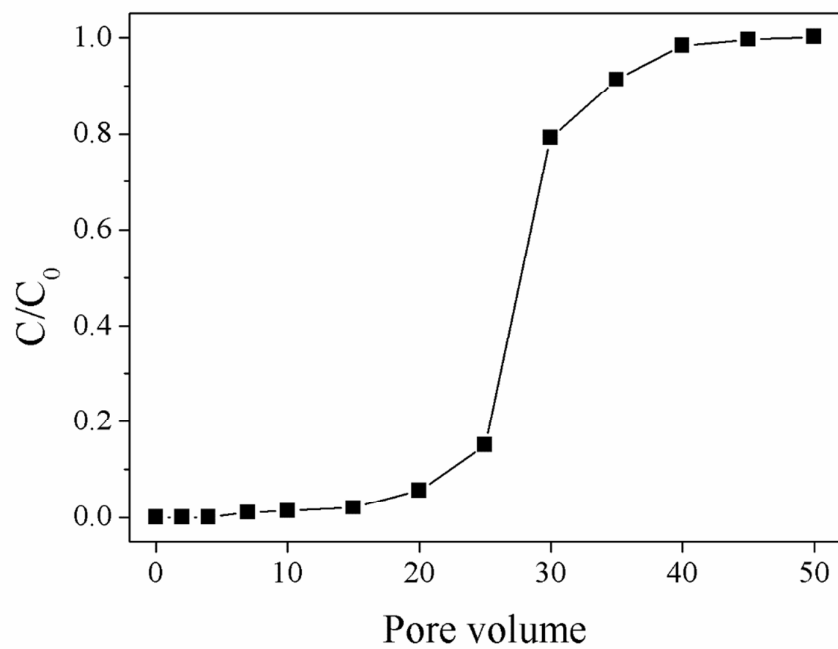

114

115 **Figure S6.** Breakthrough curves of Se(IV) through fixed-bed column containing

116 FeS-SA. Influent Se(IV) = 10 mg/L, flow rate = 10 mL/h, pH =  $6.0 \pm 0.2$ .

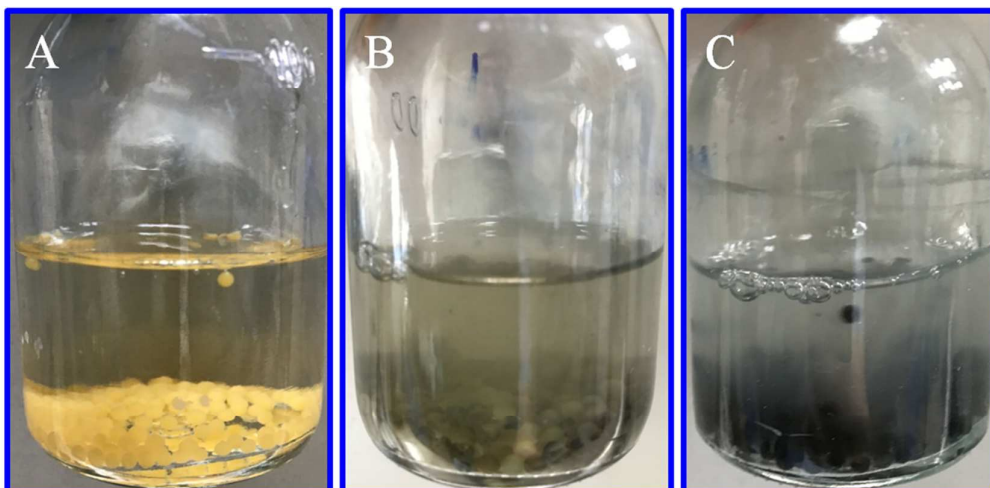

117

118 **Figure S7.** Photograph of the process of FeS-SA regeneration at (A) 0 h, (B) 12 h,

119 and (C) 24 h in the presence of SRB.

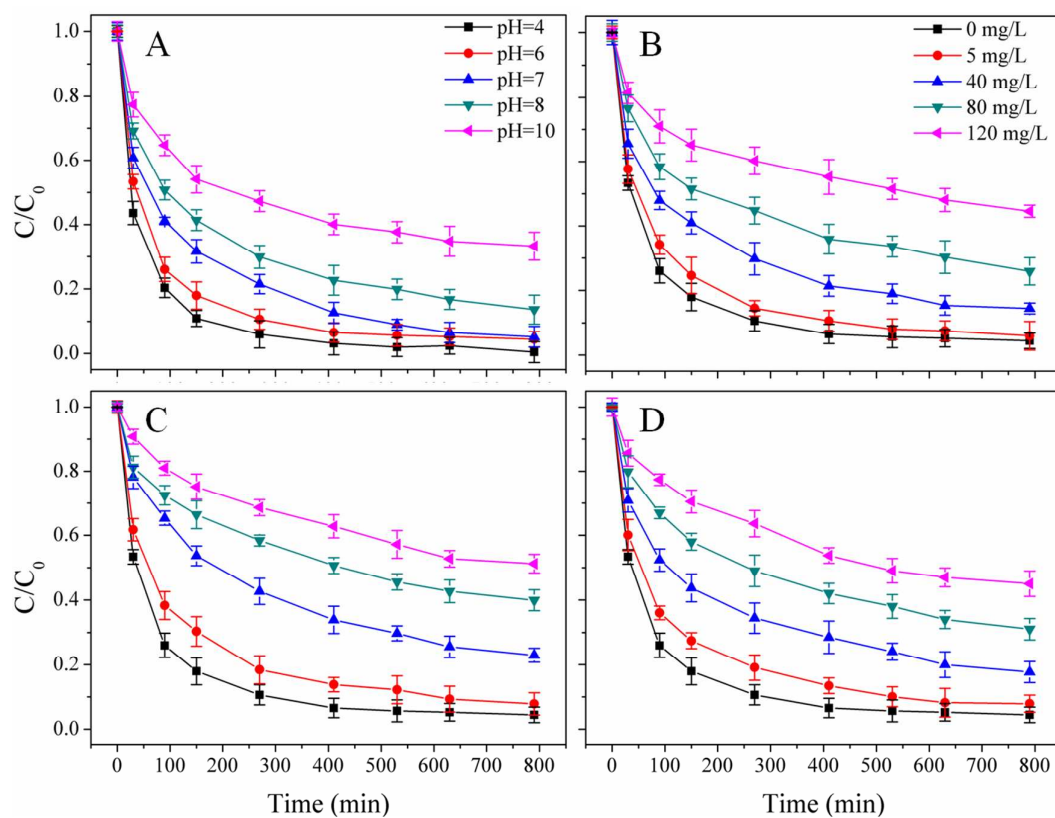

120  
 121 **Figure S8.** The effects of (A) pH, initial Se = 10 mg/L, and different concentration (B)  
 122 phosphate, (C) carbonate, and (D) chloride on the reactivity of FeS-SA for the  
 123 removal of Se(IV); initial Se = 10 mg/L, initial pH =  $6.0 \pm 0.2$  (Errors given as  
 124 standard deviation among triplicate samples).



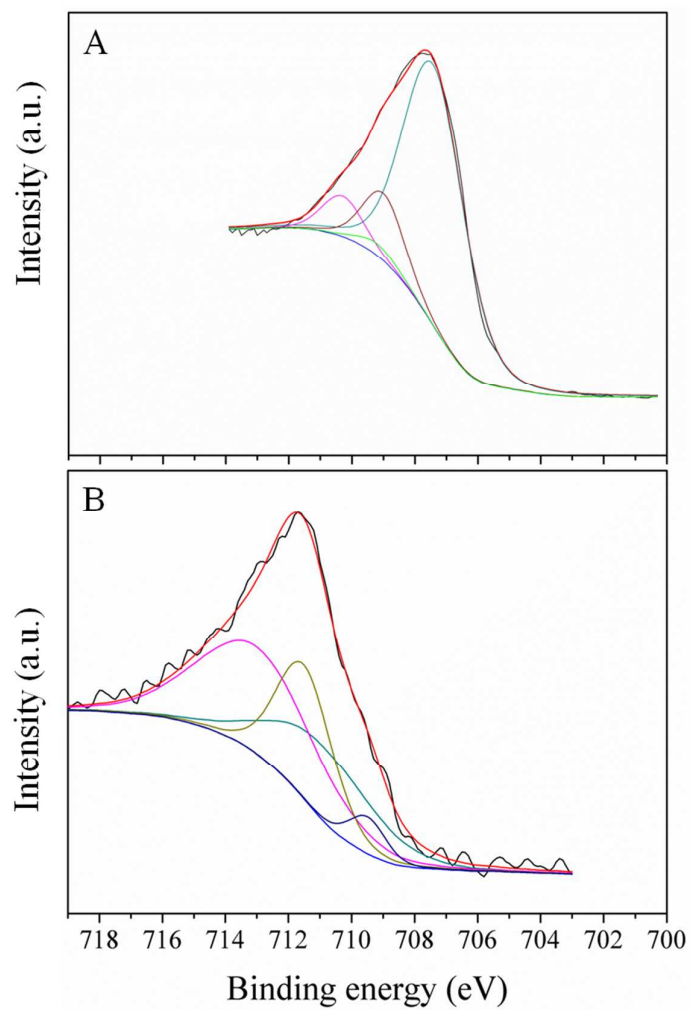

125

126 **Figure S9.** Fe 2p<sub>3/2</sub> XPS spectra of FeS-SA bead (A) before (B) after Se(IV) removal

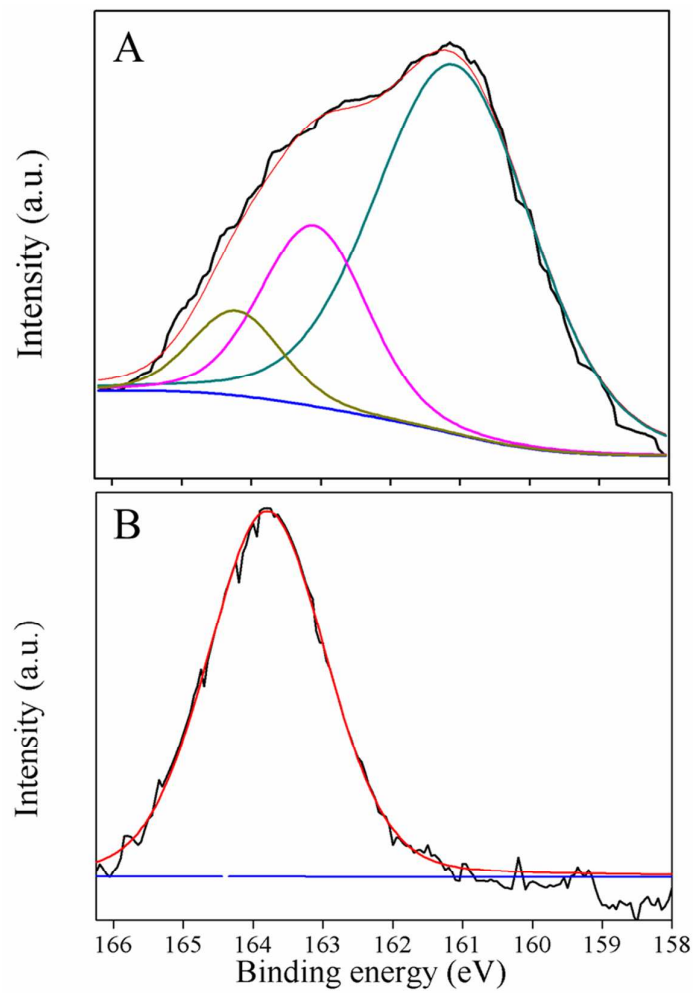

127

128 **Figure S10.** S 2p<sub>3/2</sub> XPS spectra of FeS-SA bead (A) before (B) after Se(IV) removal

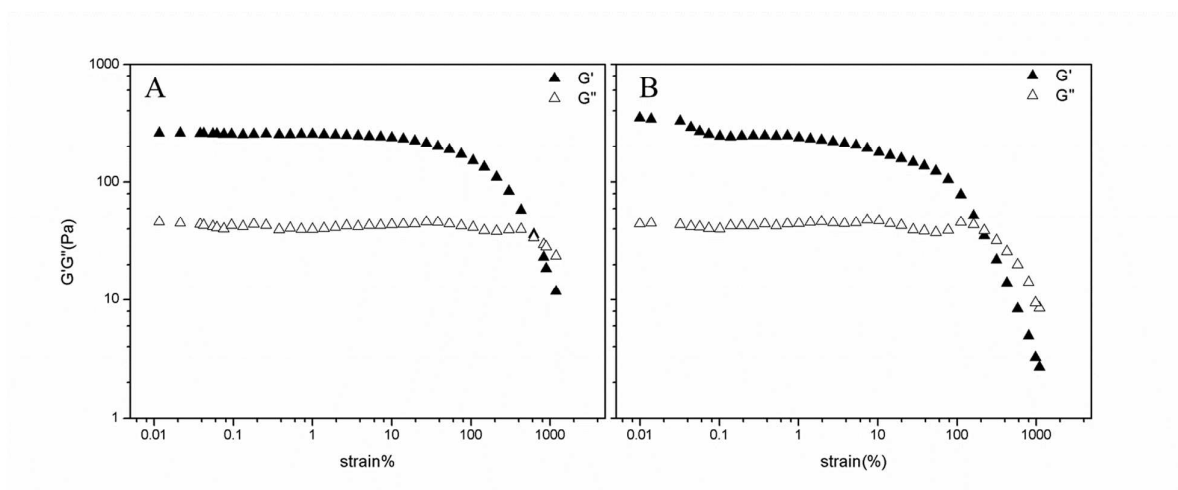

129 **Figure S11.** Strength analysis of FeS-SA beads (A) before (B) after  $\text{Se(IV)}$  treatment.

130 **Table S1.** Best-fitted parameters for Langmuir and Freundlich isotherm models

131 (Errors given as standard deviation among triplicate)

| Adsorption isotherm |                        | Parameters    | $R^2$ |
|---------------------|------------------------|---------------|-------|
| Langmuir            | $q_m$ (mg/g)           | $K_L$ (L/mg)  |       |
|                     | $128.7 \pm 5.6$        | $9.4 \pm 2.0$ | 0.972 |
| Freundlich          | $K_F, (mg/g)/(mg/L)^n$ | n             |       |
|                     | $104.2 \pm 4.0$        | $5.6 \pm 0.8$ | 0.960 |

132 **Table S2.** Se(IV) removal efficiency in various species and separated component

| Species            | Removal<br>efficiency (%) | Separated component removal efficiency (%) |     |                 |                   |
|--------------------|---------------------------|--------------------------------------------|-----|-----------------|-------------------|
|                    |                           | SA                                         | FeS | $\alpha$ -FeOOH | Stabilized effect |
| FeS                | 27                        | 0                                          | 27  | 0               | 0                 |
| FeS*               | 73                        | 0                                          | 27  | 0               | 46                |
| SA                 | 20                        | 20                                         | 0   | 0               | 0                 |
| FeS-SA             | 100                       | 20                                         | 27  | 0               | 46                |
| FeS-SA*            | 40                        | 20                                         | 0   | 11              | 9                 |
| $\alpha$ -FeOOH-SA | 31                        | 20                                         | 0   | 11              | 0                 |

133

134 **Table S3.** Pseudo-first-order and pseudo-second-order models used for simulating  
135 Se(IV) removal kinetic data and the resulting fitting parameters (Errors given as  
136 standard deviation)

| Kinetic models      |        | Parameters            |                                     | R <sup>2</sup> |
|---------------------|--------|-----------------------|-------------------------------------|----------------|
|                     |        | q <sub>e</sub> (mg/g) | K <sub>1</sub> (min <sup>-1</sup> ) |                |
| Pseudo-first-order  | FeS-SA | 91.3 ± 2.1            | (2.3 ± 0.3) × 10 <sup>-2</sup>      | 0.979          |
|                     | FeS*   | 69.3 ± 1.5            | (1.9 ± 0.2) × 10 <sup>-2</sup>      | 0.984          |
|                     | FeS    | 25.3 ± 0.9            | (1.2 ± 0.2) × 10 <sup>-2</sup>      | 0.959          |
|                     | SA     | 21.2 ± 0.7            | (4.5 ± 1.0) × 10 <sup>-2</sup>      | 0.945          |
|                     |        | q <sub>e</sub> (mg/g) | K <sub>2</sub> (g/(mg·min))         |                |
| Pseudo-second-order | FeS-SA | 98.0 ± 1.3            | (4.5 ± 0.8) × 10 <sup>-4</sup>      | 0.999          |
|                     | FeS*   | 75.0 ± 1.1            | (4.6 ± 0.8) × 10 <sup>-4</sup>      | 0.998          |
|                     | FeS    | 27.9 ± 0.7            | (7.9 ± 1.7) × 10 <sup>-4</sup>      | 0.994          |
|                     | SA     | 22.8 ± 0.2            | (33.8 ± 7.6) × 10 <sup>-4</sup>     | 0.999          |

137 Pseudo-first-order model is represented as:

$$q = q_e(1 - e^{-K_1 t})$$

138 Pseudo-second-order model is described as:

$$\frac{t}{q} = \frac{1}{K_2 q_e^2} + \frac{1}{q_e} t$$

139 In the equation q<sub>e</sub> is the equilibrium adsorption quantity (mg/g), q is the adsorption  
140 capacity (mg/g), K<sub>1</sub> is pseudo-first-order rate constant (min<sup>-1</sup>), K<sub>2</sub> is  
141 pseudo-second-order rate constant (g/(mg·min))

142 **Table S4.** Best-fitted parameters for Weber-Morris model for Se(IV) removal kinetic  
143 data.

| Diffusion models | stages                  | Parameters     |                |       |
|------------------|-------------------------|----------------|----------------|-------|
|                  |                         | $K_w$          | C              | $R^2$ |
| Weber-Morris     | Film diffusion          | $8.6 \pm 0.2$  | $0.3 \pm 0.1$  | 0.998 |
|                  | Intraparticle diffusion | $1.7 \pm 0.5$  | $61.2 \pm 6.9$ | 0.890 |
|                  | Equilibrium             | $0.2 \pm 0.03$ | $89.4 \pm 0.7$ | 0.962 |

144 In Weber-Morris model, Curves are commonly interpreted as a three-stage linear  
145 plot with an external mass transfer-controlled phase, an intraparticle mass  
146 transfer-controlled phase, and the equilibrium phase. If plotting  $q_t$  below equation  
147 vs.  $\sqrt{t}$  yields a linear relation through the origin, this is seen as evidence for mass  
148 transfer control.<sup>36</sup> Following equations will be defined assuming that all particles are  
149 uniform spheres of radius R.

150 
$$q_t = K_w \sqrt{t} + C$$

151 where  $q_t$  is adsorption capacity at time  $t$ , and  $q_e$  is equilibrium adsorption quantity  
152 after an infinite time,  $K_w$  is intraparticle diffusion rate constant, C is related to  
153 thickness of beads.

154 **Table S5.** XPS analytic results based on the curve fitting for Fe 2p3/2 and S 2p3/2  
 155 peaks before and after reaction in Figures S9 and S10.

| Element   | Binding energy<br>(eV) | Species              | Relative fraction (%) |
|-----------|------------------------|----------------------|-----------------------|
| Fe(2p3/2) | 707.4                  | Fe (II)-S            | 79.6 ± 2.3            |
|           | 709.0                  | Fe(II)-O             | 6.4 ± 0.6             |
|           | Before 709.3           | Fe (III)-S           | 3.4 ± 1.6             |
|           | 710.3                  | Fe (II)-S            | 10.6 ± 2.1            |
|           | 710.9                  | FeSe                 | 26.8 ± 3.6            |
|           | 711.5                  | α-FeOOH              | 25.9 ± 2.8            |
|           | After 709.3            | Fe (II)-O            | 4.3 ± 1.1             |
|           | 713.0                  | Fe (III)-O           | 43.0 ± 1.7            |
| S(2p3/2)  | 161.3                  | S(-II)               | 71.3 ± 2.7            |
|           | Before 163.4           | S <sub>n</sub> (-II) | 25.6 ± 1.3            |
|           | 164.0                  | S <sub>n</sub> (0)   | 3.1 ± 0.4             |
|           | After 164.0            | S <sub>n</sub> (0)   | 100 ± 1.2             |

156
